# Supplementary material
Source: publisher site journal article supplement (https://www.dovepress.com/article/462701)
Supplement: Supplementary file 1 [file get_supplementary_file.php]

**SUPPLEMENTARY FILES**

**Figure S1.** Kaplan-Meier curves describing OS (panel A) and PFS (panel B) of the whole cohort.

**Figure S2.** Kaplan-Meier curves describing OS (panel A) and PFS (panel B) of the population stratified per CP class.

**Table S1**. Subgroup regression analysis on the variables associated to portal hypertension related

bleeding events (A), bleeding events from any site (B) and gastrointestinal bleeding events (C).

**A**

| **Bleeding any site (37 events)** | | | | | | |
| --- | --- | --- | --- | --- | --- | --- |
| V**ariable** | **Univariate Analysis** | | | **Multivariate Analysis** | | |
| OR | 95% CI | p value | OR | 95% CI | p value |
| PLT <150 | 3.37 | 1.57-7.26 | **0.002** | 3.28 | 1.51-7.18 | **0.003** |
| PVT | 1.98 | 1.01-3.98 | **0.045** | 1.77 | 0.83-3.79 | 0.140 |
| ALBI GRADE (2 and 3 vs 1) | 2.24 | 1.05-4.81 | **0.038** | 1.84 | 0.81-4.16 | 0.145 |
| Antiplatelets treatment | 2.30 | 0.91-5.74 | 0.075 | 2.614 | 0.96-6.83 | 0.120 |
| Child-Pugh Class (B vs A ) | 0.94 | 0.41-2.16 | 0.883 |  |  |  |

| **Portal hypertension related bleeding (20 events)** | | | | | | |
| --- | --- | --- | --- | --- | --- | --- |
| **Variable** | Univariate Analysis | | | Multivariate Analysis | | |
| OR | 95% CI | p value | OR | 95% CI | p value |
| PVT | 3.47 | 1.30-9.24 | **0.013** | 2.55 | 0.87-7.42 | 0.087 |
| ALBI grade (1 vs 2 and 3) | 4.82 | 1.39-16.76 | **0.013** | 1.99 | 0.70-7.86 | 0.121 |
| PLT <150 mm | 4.79 | 1.57-14.64 | **0.006** | 2.86 | 0.84-9.72 | 0.092 |
| Varices (yes vs no) | 7.31 | 2.05-26.00 | **0.002** | 3.85 | 0.97-15.23 | 0.055 |
| Antiplatelets treatment | 2.47 | 0.77-7.83 | 0.125 |  |  |  |
| Child-Pugh Class (B vs A ) | 1.37 | 0.48-3.91 | 0.553 |  |  |  |

**B)**

| **Gastrointestinal bleeding (26 events)** | | | | | | |
| --- | --- | --- | --- | --- | --- | --- |
| **Variable** | **Univariate Analysis** | | | **Multivariate Analysis** | | |
|  | OR | 95% CI | p value | OR | 95% CI | p value |
| PVT | 3.41 | 1.44-8.06 | **0.005** | 2.54 | 0.97-6.60 | 0.056 |
| ALBI grade (1 vs 2 and 3) | 3.61 | 1.33-9.79 | **0.012** | 1.51 | 0.88-4.75 | 0.120 |
| PLT <150 | 5.10 | 1.91-14.04 | **0.001** | 0.99 | 0.91-7.2 | 0.060 |
| Varices (yes vs no) | 5.32 | 1.90-14.93 | **0.001** | 3.10 | 0.99-9.75 | 0.052 |
| Varices (G1 vs G2 and G3) | 1.05 | 1,01-1,10 | **0.036** |  |  |  |
| Antiplatelets treatment | 3.12 | 0.87-6.37 | 0.183 |  |  |  |
| Child-Pugh Class (B vs A ) | 1.28 | 0.48-3.19 | 0.671 |  |  |  |

**C)**

**Abbreviations:** PVT: portal vein thrombosis, PLT: platelets

**Note:** statistical significance is expressed in bold value.

**Table S2.** Best radiological response evaluated per RECIST criteria version 1.1

| ***Atezolizumab and Bevacizumab*** | *Overall Population*  *(n=334*a*)* | *Child-Pugh A*  *(n=275)* | *Child-Pugh B*  *(n=59)* |
| --- | --- | --- | --- |
| **ORRb, %**  **DCRc, %** | 28.4%  75.7% | 30.5%  77.8% | 18.6%  66.1% |
| Complete response | 2.4% | 2.9% | 0 |
| Partial response | 26.0% | 27.6% | 18.6% |
| Stable disease | 47.3% | 47.3% | 47.5% |
| Progressive disease | 24.3% | 22.2% | 33.9% |

**Notes**: aRadiological response was available for 334 patients (90.5% of the efficacy population); bORR was considered the sum of complete and partial responses; cDCR was considered the sum of complete, partial responses and stable disease.

**Abbreviations:** RECIST, Response Evaluation Criteria in Solid Tumors; ORR, overall response rate; DCR, disease control rate.
